# Supplementary material for: Acidity scales of deep eutectic solvents based on IR and NMR
Source: Royal Society of Chemistry journal article supplement (doi:10.1039/d2cp01816k), 2022-01-01
Supplement: d2cp01816k1.pdf [file d2cp01816k1.pdf]

## Supporting Information

### Acidity Scales of Deep Eutectic Solvents based on IR and NMR

Fengyi Zhou,<sup>a</sup> Ruifen Shi,<sup>a</sup> Yingxiong Wang,<sup>b</sup> Zhimin Xue,<sup>\*,c</sup> Baolong Zhang,<sup>a</sup> and Tiancheng Mu<sup>\*,a</sup>

*a: Key Laboratory of Advanced Light Conversion Materials and Biophotonics, Department of Chemistry, Renmin University of China, Beijing 100872, China. Tel: +86-10-62514925, E-mail: [tcmu@ruc.edu.cn](mailto:tcmu@ruc.edu.cn)*

*b: Institute of Coal Chemistry, Chinese Academy of Science, Taiyuan 030001, Shanxi, China.*

*c: Beijing Key Laboratory of Lignocellulosic Chemistry, College of Materials Science and Technology, Beijing Forestry University, Beijing 100083, China. E-mail: [zmxue@bjfu.edu.cn](mailto:zmxue@bjfu.edu.cn)*

**Table S1** Components and molar ratios of the prepared DESs

| Type                                | HBA : HBD                                   | Molar ratio | Heating Temperature/°C |
|-------------------------------------|---------------------------------------------|-------------|------------------------|
| I                                   | ChCl : ZnCl <sub>2</sub>                    | 1 : 2       | 80                     |
|                                     | ChCl : FeCl <sub>3</sub>                    | 1 : 2       | 80                     |
|                                     | ChCl : SnCl <sub>2</sub>                    | 1 : 2       | 80                     |
|                                     | ChCl : CuCl <sub>2</sub>                    | 1 : 2       | 80                     |
| II                                  | ChCl : MgCl <sub>2</sub> ·6H <sub>2</sub> O | 1 : 1       | 80                     |
|                                     | ChCl : CoCl <sub>2</sub> ·6H <sub>2</sub> O | 1 : 1       | 80                     |
|                                     | ChCl : CuCl <sub>2</sub> ·2H <sub>2</sub> O | 1 : 1       | 80                     |
|                                     | ChCl : CaCl <sub>2</sub> ·6H <sub>2</sub> O | 1 : 2       | 80                     |
|                                     | ChCl : CrCl <sub>3</sub> ·6H <sub>2</sub> O | 1 : 1       | 80                     |
| III                                 | ChCl : Ethylene glycol                      | 1 : 2       | 60                     |
|                                     | ChCl : Formic acid                          | 1 : 2       | 45                     |
|                                     | ChCl : Acetic acid                          | 1 : 2       | 45                     |
|                                     | ChCl : Propionic acid                       | 1 : 2       | 45                     |
|                                     | ChCl : Lactic acid                          | 1 : 2       | 45                     |
|                                     | ChCl : Oxalic acid                          | 1 : 2       | 60                     |
|                                     | ChCl : Malonic acid                         | 1 : 2       | 60                     |
| IV                                  | ZnCl <sub>2</sub> : 1,2-Propylene glycol    | 1 : 4       | 60                     |
|                                     | ZnCl <sub>2</sub> : 1,3-Propylene glycol    | 1 : 4       | 60                     |
|                                     | ZnCl <sub>2</sub> : Ethylene glycol         | 1 : 4       | 60                     |
|                                     | ZnCl <sub>2</sub> : 1,2-Butanediol          | 1 : 4       | 60                     |
|                                     | ZnCl <sub>2</sub> : 1,3-Butanediol          | 1 : 4       | 60                     |
|                                     | ZnCl <sub>2</sub> : 1,4-Butanediol          | 1 : 4       | 60                     |
|                                     | ZnCl <sub>2</sub> : 1,6-hexanediol          | 1 : 3       | 60                     |
|                                     | ZnCl <sub>2</sub> : Glycerol                | 1 : 4       | 60                     |
|                                     | CuCl <sub>2</sub> : Ethylene glycol         | 1 : 4       | 60                     |
|                                     | CuCl <sub>2</sub> : Ethylene glycol         | 1 : 3       | 60                     |
|                                     | CuCl <sub>2</sub> : Ethylene glycol         | 1 : 2       | 60                     |
|                                     | CuCl <sub>2</sub> : Ethylene glycol         | 1 : 1       | 60                     |
|                                     | CuCl <sub>2</sub> : Glycerol                | 1 : 4       | 60                     |
|                                     | CuCl <sub>2</sub> : 1,2-Propylene glycol    | 1 : 4       | 60                     |
| CuCl <sub>2</sub> : 1,4-Butanediol  | 1 : 4                                       | 60          |                        |
| FeCl <sub>3</sub> : Ethylene glycol | 1 : 4                                       | 60          |                        |

## The effect of different molar ratios

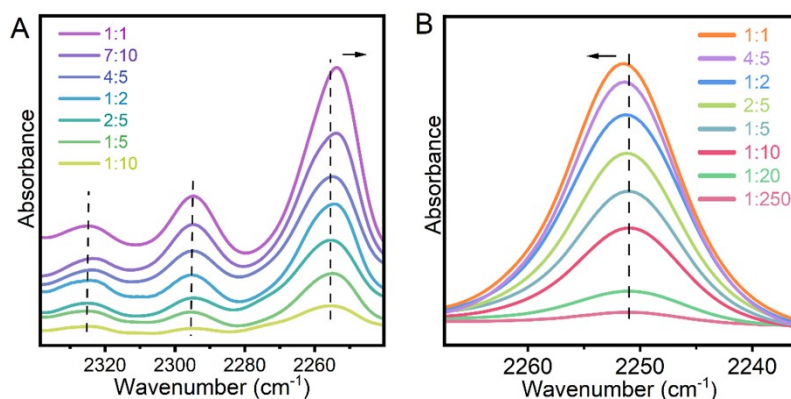

Fig. S1 FT-IR spectra in the  $\nu(\text{C}\equiv\text{N})$  region of (A)  $\text{CH}_3\text{CN}-\text{CuCl}_2:4\text{EG}$  and (B)  $\text{CH}_3\text{CN}-\text{ChCl}:2\text{EG}$  systems with increasing molar ratio from bottom to top.

For ADESs, it is crucial to find out the appropriate quantity of the probe to prevent breaking the weak interactions in DES as possible. As shown in Fig.S1, the proper molar ratio is 1:10, A closer look will find that the peak at 2255  $\text{cm}^{-1}$  shifts to 2253  $\text{cm}^{-1}$  with the increasing molar ratio (Fig. S1A), and Fig. S1B shows the blue shift to 2253  $\text{cm}^{-1}$ . It suggests the free acetonitrile gradually appears because the pure acetonitrile has the peak of  $\nu(\text{C}\equiv\text{N})$  at 2253  $\text{cm}^{-1}$ .

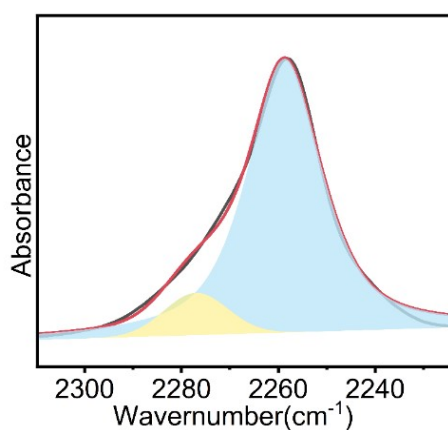

Fig. S2 The IR spectra and the fitted bands in the  $\nu(\text{C}\equiv\text{N})$  region for  $\text{ChCl}:2\text{SnCl}_2$  containing  $\text{CD}_3\text{CN}$ , the global fit is in red. The absorption bands at 2278 and 2260  $\text{cm}^{-1}$  are attributed to the  $\text{C}\equiv\text{N}$  stretches of  $\text{CD}_3\text{CN}$  coordinated to  $\text{Sn}^{2+}$  and the other ion species, respectively.

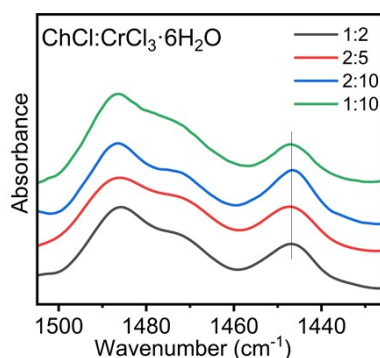

Fig. S3 FT-IR spectra of pyridine-ChCl:5HCOOH systems with increasing molar ratio from bottom to top.

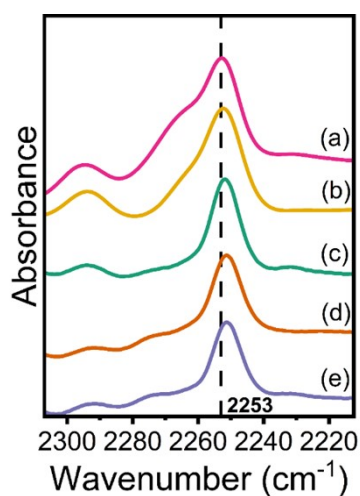

Fig. S4 C≡N stretching vibration of acetonitrile in type III DESs. (a)ChCl:2(COOH)<sub>2</sub> (b) ChCl:2CH<sub>3</sub>(COOH)<sub>2</sub> (c) ChCl:2HCOOH (d) ChCl:2CH<sub>3</sub>COOH (e) ChCl:2C<sub>2</sub>H<sub>5</sub>COOH.

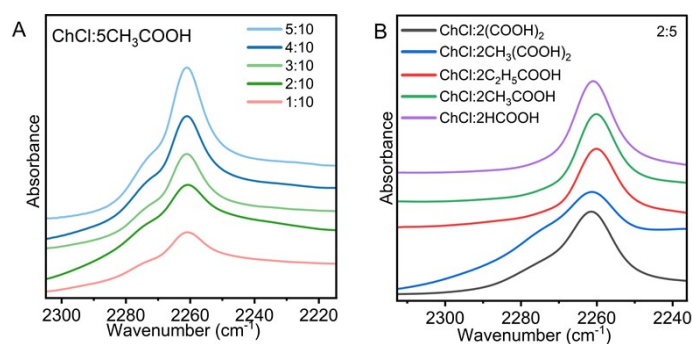

Fig. S5 (A) FT-IR spectra in the  $\nu(\text{C}\equiv\text{N})$  region of  $\text{CD}_3\text{CN}-\text{ChCl}:5\text{CH}_3\text{COOH}$  systems with increasing molar ratio from bottom to top. (B) FT-IR spectra in the  $\nu(\text{C}\equiv\text{N})$  region of different  $\text{CD}_3\text{CN}-\text{BADES}$  systems with a molar ratio of 2:5.

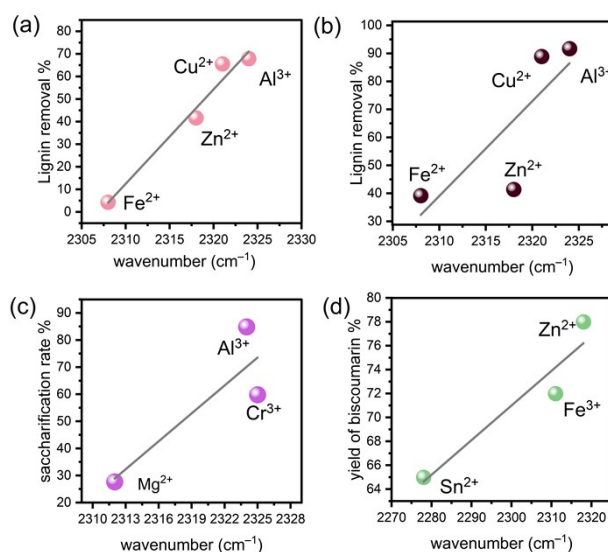

Fig. S6 The correlation between Lewis acidity of metal ions and performance in different applications. (a) The data of lignin removal were taken from Ref. [1]. (b) The data of lignin removal were taken from Ref. [2]. (c) The data of rates were taken from Ref. [3]. (d) The data of yields were taken from Ref. [4].

To prove the IR acetonitrile approach could be used as guidance for practical applications. We made a correlation between Lewis acidity of metal ions and performance in different applications. By neglecting the difference between these DESs, we presumed that Lewis acidity metal ions do not change with the HBAs. Although the reactions are influenced by many factors, it still could be found that the performance of different applications corresponds to the trend of Lewis acidity.

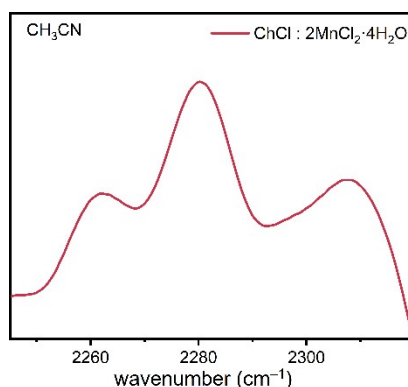

Fig. S7 C≡N stretching vibration of acetonitrile in ChCl: 2MnCl<sub>2</sub>·4H<sub>2</sub>O.

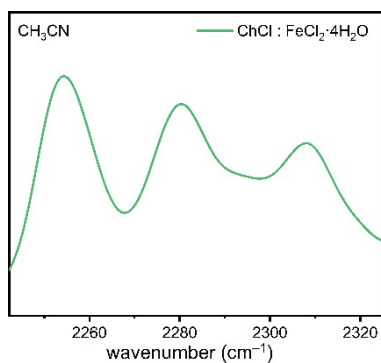

Fig. S8 C≡N stretching vibration of acetonitrile in ChCl: FeCl<sub>2</sub>·4H<sub>2</sub>O.

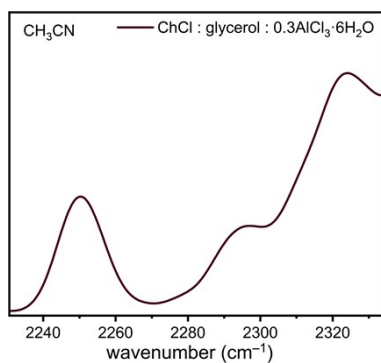

Fig. S9 C≡N stretching vibration of acetonitrile in ChCl: glycerol:0.3AlCl<sub>3</sub>·6H<sub>2</sub>O.

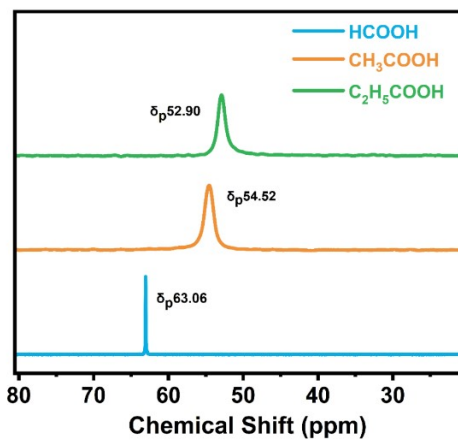

Fig. S10 <sup>31</sup>P NMR spectra of TMPO as probe in Brønsted acid.

Calculations of radius (Å)/ charge (e) ratio (r/z) of metal cations:

Cr<sup>3+</sup> r=0.615 vi z=3

Cu<sup>2+</sup> r=0.57 iv z=2

Co<sup>2+</sup> r=0.65 vi z=2

Mg<sup>2+</sup> r=0.72 vi z=2

Ca<sup>2+</sup> r=1 vi z=2

All data of radius were taken from reference<sup>5</sup>.

Table S2 Comparison of the solvatochromic parameter  $\alpha$  with  $^{31}\text{P}$  chemical shift in different BADES.

| BADES                  | $\alpha$              | $^{31}\text{P}$ chemical shift (ppm) |
|------------------------|-----------------------|--------------------------------------|
| ChCl : 2oxalic acid    | 2.173 <sup>6, a</sup> | 75.21                                |
| ChCl : 2malonic acid   | 1.39 <sup>7, a</sup>  | 59.31                                |
| ChCl : 2formic acid    | 1.293 <sup>8</sup>    | 54.43                                |
| ChCl : 2acetic acid    | 1.232 <sup>8</sup>    | 51.87                                |
| ChCl : 2propionic acid | 1.193 <sup>8</sup>    | 51.29                                |
| ChCl : 2ethyle glycol  | 0.891 <sup>9</sup>    | 47.59                                |

Note: <sup>a</sup> The molar ratio of BADES in reference is 1:1.

1. Z.-K. Wang, H. Li, X.-C. Lin, L. Tang, J.-J. Chen, J.-W. Mo, R.-S. Yu and X.-J. Shen, *Bioresour. Technol.*, 2020, **307**, 123237.
2. Z.-K. Wang, S. Hong, J.-I. Wen, C.-Y. Ma, L. Tang, H. Jiang, J.-J. Chen, S. Li, X.-J. Shen and T.-Q. Yuan, *ACS Sustainable Chemistry & Engineering*, 2020, **8**, 1050-1057.
3. Q. Ji, X. Yu, A. E. A. Yagoub, L. Chen, A. T. Mustapha and C. Zhou, *Renewable Energy*, 2021, **172**, 304-316.
4. F. Abbasi, N. Azizi and M. Abdoli-Senejani, *Journal of the Iranian Chemical Society*, 2017, **14**, 2097-2103.
5. R. D. Shannon, *Acta Crystallographica Section A*, 1976, **32**, 751-767.
6. C. Cai, W. Yu, C. Wang, L. Liu, F. Li and Z. Tan, *J. Mol. Liq.*, 2019, **287**, 110957.
7. C. Florindo, A. J. S. McIntosh, T. Welton, L. C. Branco and I. M. Marrucho, *Phys. Chem. Chem. Phys.*, 2018, **20**, 206-213.
8. Y. Oh, S. Park, D. Jung, K. K. Oh and S. H. Lee, *Int. J. Biol. Macromol.*, 2020, **165**, 187-197.
9. S. H. Kim, S. Park, H. Yu, J. H. Kim, H. J. Kim, Y.-H. Yang, Y. H. Kim, K. J. Kim, E. Kan and S. H. Lee, *J. Mol. Catal. B: Enzym.*, 2016, **128**, 65-72.
